# Supplementary material for: Two Ways of Targeting a CD19 Positive Relapse of Acute Lymphoblastic Leukaemia after Anti-CD19 CAR-T Cells
Source: MDPI journal article supplement (doi:10.3390/biomedicines11020345), 2023-01-25
Supplement: s1 [file s1]

## SUPPLEMENTARY MATERIAL:

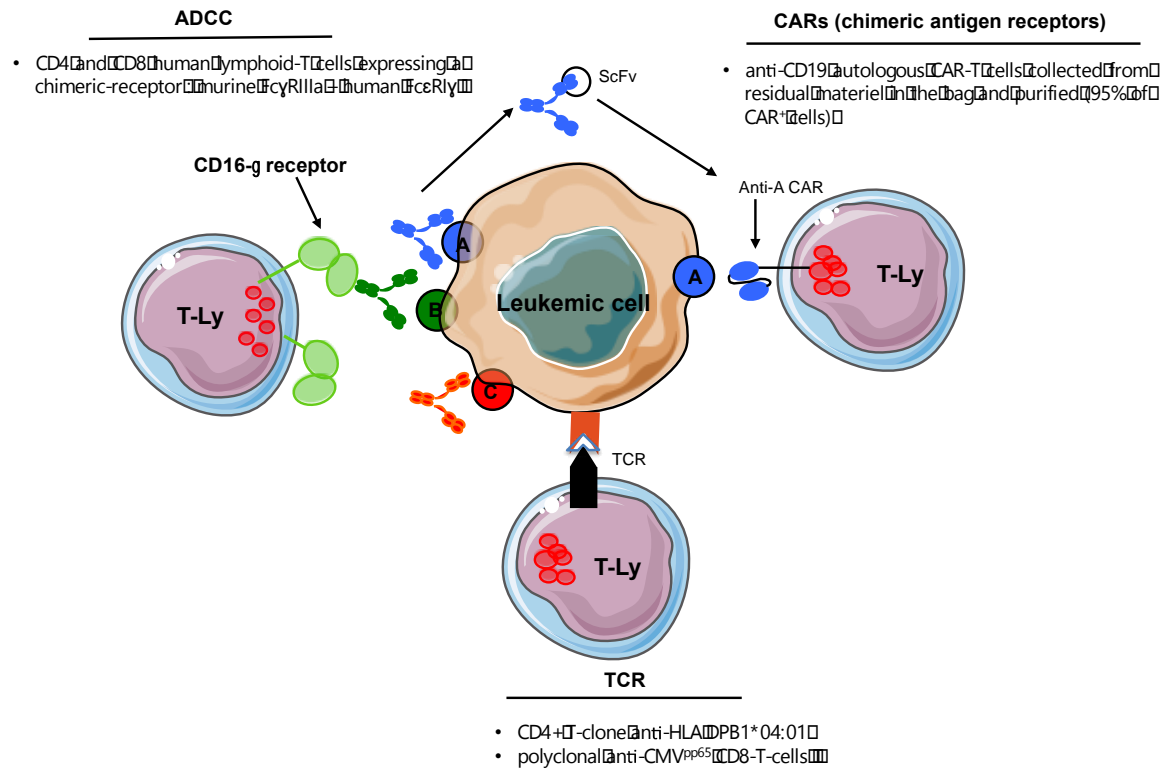

**Figure S1:** T-cell effectors used in the cytotoxicity assay. To compare the lysis sensitivity of each ALL, some T-lymphoid effectors were used, capable of inducing targeted cell death via different mechanisms: purified autologous anti-CD19 CAR-T cells inducing lysis through CD19 recognition by the CAR; CD4<sup>+</sup> T-clone anti-HLA DPB1\*04:01 and polyclonal anti-CMVpp65 CD8-T-cells inducing cell lysis through the TCR; and CD4 and CD8 human lymphoid T-cells transduced by a lentiviral vector, expressing a chimeric-receptor containing the murine CD16 receptor inducing cell lysis when combined with murine antibodies through the ADCC mechanism.



|                  |        |                      |                       |
|------------------|--------|----------------------|-----------------------|
| BLANK            | CD244  | DLL1                 | HLA-DR                |
| Hamster IgG ctrl | CD245  | DLL4                 | Ig light chain lambda |
| CCR10            | CD25   | DR3                  | IgD                   |
| CD278            | CD252  | EGFR                 | IL-28RA               |
| IFN-gRb          | CD261  | GITR                 | Integrin b5           |
| Mouse IgG1 ctrl  | CD262  | GPR19                | KLRG1                 |
| CD46             | CD263  | GPR56                | LOX-1s                |
| CD70             | CD266  | HLA-Es               | MICA-MICB             |
| CD1a             | CD268  | HVEM                 | MSC W3D5              |
| CD2              | CD27   | Ig light chain kappa | Notch-2               |
| b2m              | CD271  | IgM                  | TACSTD2               |
| B7-H4            | CD275  | IL-21R               | TIGIT                 |
| Cadherin 11      | CD276  | Integrin a9b1        | Mouse IgG2b ctrl      |
| CD10             | CD277  | Jagged 2             | C3AR                  |
| CD100            | CD279  | Ksp37                | CCX-CKR               |
| CD103            | CD28   | LAP                  | CD11c                 |
| CD105            | CD29   | LY6G6D               | CD129                 |
| CD106            | CD290  | MERTK                | CD158                 |
| CD107a           | CD298  | MSC W7C6             | CD181                 |
| CD107b           | CD3    | MSC NPC W4A5         | CD193                 |
| CD109            | CD30   | MSCA                 | CD196                 |
| CD111            | CD300c | MUC-13               | CD1d                  |
| CD112            | CD309  | NKp80                | CD20                  |
| CD114            | CD31   | Notch-1              | CD22                  |
| CD116            | CD314  | Notch-3              | CD220                 |
| CD117            | CD317  | Notch-4              | CD235ab               |
| CD119            | CD324  | NPC                  | CD258                 |
| CD11a            | CD325  | NTB-A                | CD274                 |
| CD11b            | CD328  | PSMA                 | CD319                 |
| CD122            | CD33   | ROR1                 | CD32                  |
| CD123            | CD334  | Siglec-10            | CD326                 |
| CD126            | CD335  | Siglec-7             | CD338                 |
| CD127            | CD336  | Siglec-8             | CD368                 |
| CD13             | CD337  | Siglec-9             | CD45RA                |
| CD131            | CD34   | SSEA-5               | CD45RB                |
| CD134            | CD340  | SUSD2                | CD49e                 |
| CD135            | CD344  | TCRab                | CD52                  |
| CD137            | CD35   | TCR gd               | CD66ace               |
| CD137L           | CD354  | Tim-4                | CD85h                 |
| CD138            | CD360  | TLT-2                | CD85j                 |
| CD14             | CD365  | TM4SF20              | CD86                  |
| CD140a           | CD366  | TRA-2-49             | CD92                  |
| CD140b           | CD367  | TRA-2-54             | CXCR7                 |
| CD141            | CD36L1 | TSLPR                | Delta opioid R        |
| CD142            | CD38   | VEGFR3               | DRD1                  |
| CD143            | CD39   | Mouse IgG2a ctrl     | EphA2                 |
| CD146            | CD4    | APCDD1               | FceRIa                |
| CD148            | CD40   | BTLA                 | GARP                  |
| CD15             | CD41   | CCR8                 | IL-15Ra               |
| CD150            | CD42b  | CCRL2                | LT-bR                 |
| CD151            | CD43   | CD102                | MRGX2                 |
| CD154            | CD44   | CD104                | TMEM8A                |
| CD156c           | CD45   | CD124                | CD254                 |
| CD158e1          | CD47   | CD130                | CD318                 |
| CD16             | CD48   | CD144                | Mouse IgG3 ctrl       |
| CD161            | CD49a  | CD152                | CD255                 |
| CD162            | CD49b  | CD155                | SSEA-4                |
| CD163            | CD49c  | CD158b               | Mouse IgM ctrl        |
| CD164            | CD49d  | CD184                | Sialyl Lewis X        |
| CD165            | CD5    | CD186                | TRA-1-80              |
| CD166            | CD50   | CD192                | CD160                 |
| CD169            | CD54   | CD197                | CD57                  |
| CD170            | CD55   | CD199                | CD66b                 |
| CD172ab          | CD56   | CD209                | TRA-1-60R             |
| CD172g           | CD58   | CD217                | Rat IgG1 ctrl         |
| CD178            | CD6    | CD230                | CD115                 |
| CD179a           | CD61   | CD24                 | CD201                 |
| CD179b           | CD62E  | CD243                | Rat IgG2a             |
| CD18             | CD62L  | CD26                 | CD120b                |
| CD180            | CD62P  | CD269                | CD210                 |
| CD182            | CD63   | CD282                | CD267s                |
| CD183            | CD64   | CD284                | CD294                 |
| CD185            | CD69   | CD301                | CD49f                 |
| CD19             | CD73   | CD303                | CD85a                 |
| CD191            | CD74   | CD304                | CD85d                 |
| CD194            | CD79b  | CD307                | IgG Fc                |
| CD1b             | CD8    | CD323                | Integrin b7           |
| CD1c             | CD80   | CD357                | XCR1                  |
| CD200            | CD81   | CD36                 | Podoplanin            |
| CD200R           | CD82   | CD369                | Rat IgG2b ctrls       |
| CD202b           | CD83   | CD370                | CD132                 |
| CD203c           | CD85g  | CD371                | CD195                 |
| CD205            | CD85k  | CD45RO               | CX3CR1                |
| CD206            | CD87   | CD51                 | Rat IgM ctrl          |
| CD207            | CD89   | CD59                 | SSEA-3                |
| CD21             | CD8a   | CD7                  |                       |
| CD213a1          | CD9    | CD71                 |                       |
| CD213a2          | CD90   | CD84                 |                       |
| CD218a           | CD93   | CD88                 |                       |
| CD221            | CD94   | CRTAM                |                       |
| CD223            | CD95   | HER-3                |                       |
| CD226            | CD96   | FPR3                 |                       |
| CD227            | CD97   | Ganglioside GD2      |                       |
| CD229            | CD99   | GPR83                |                       |
| CD23             | CXCL16 | HLA-ABC              |                       |
| CD231            |        |                      |                       |

**Figure S2: Antigens screened by the Human Cell Surface Marker Screening Kit from Biolegend® (LEGENDscreen). Each plaque was detailed in one column.**



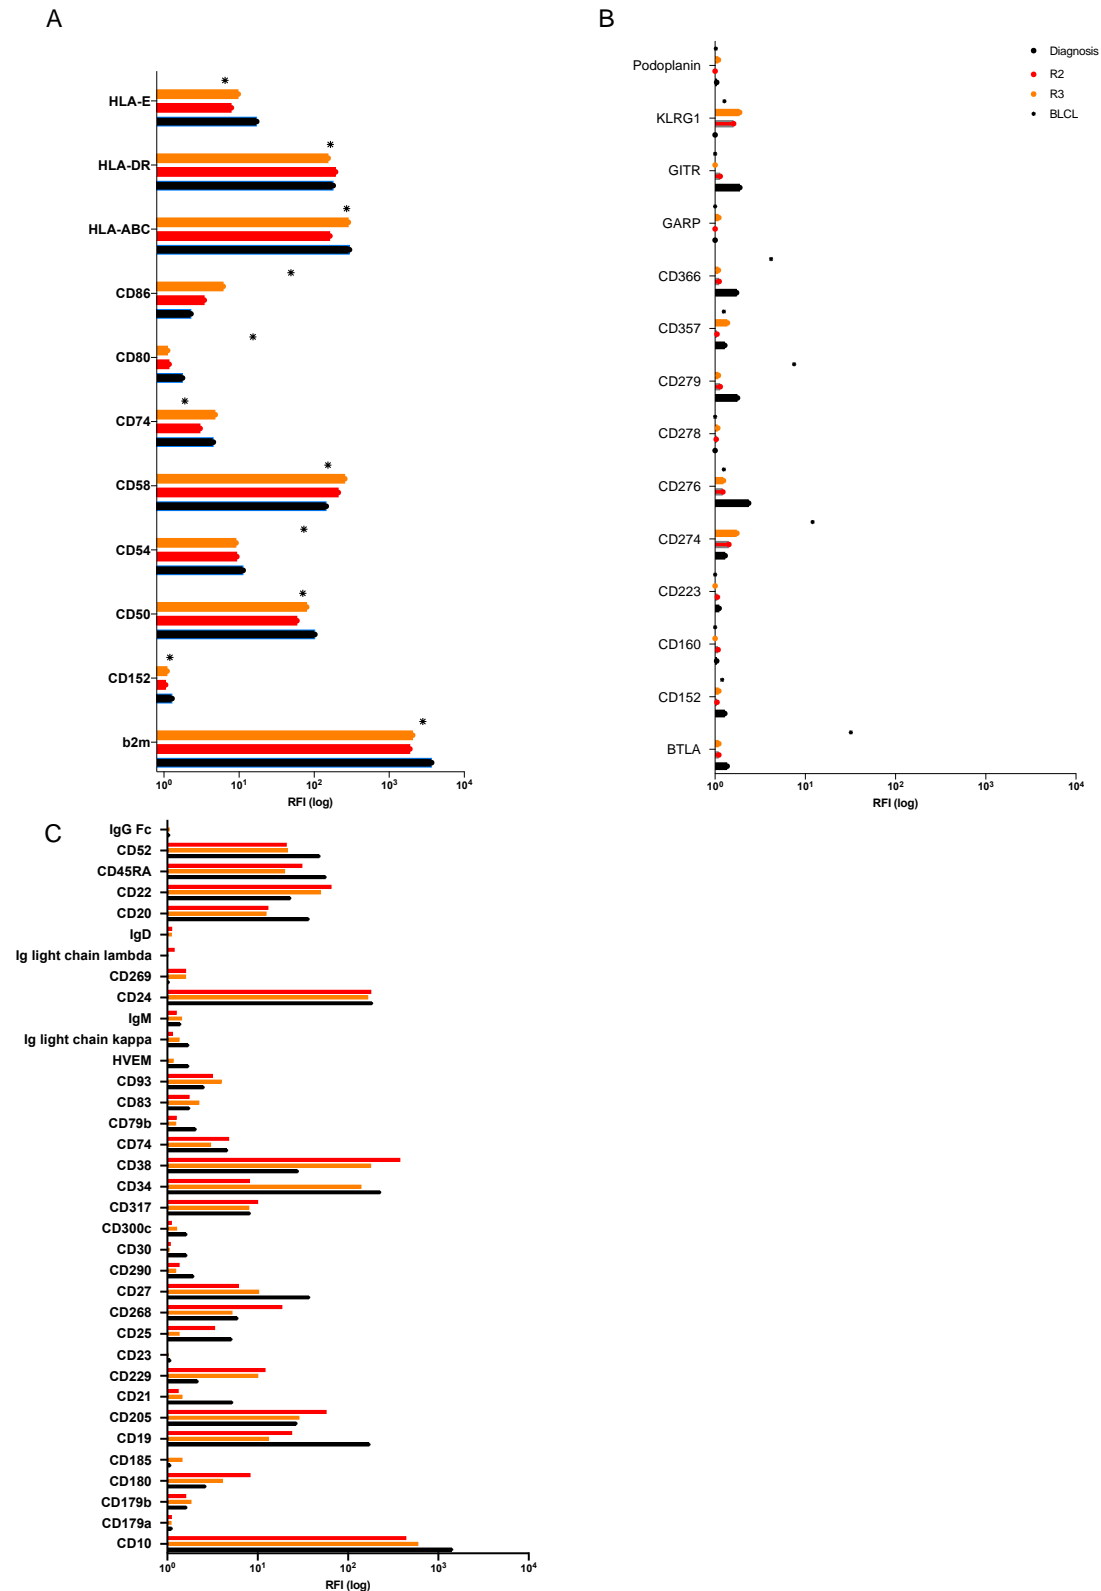

**Figure S3: Immunophenotyping results:** Immunophenotyping results for the 3 ALL: at diagnosis (Dg), post-HSCT relapse (R2) and post-CAR-T relapse (R3). A: molecules involved in the immunological synapse; B: checkpoint inhibitors and C: B-cells markers. The immunophenotype of a B-EBV induced cell line (BLCL) was presented as a control.



CD205; CD200R; CD183; CD18; CD179a; CD172 $\alpha\beta$ ; CD170; CD16; CD156c; CD15; CD14; CD137L; CD13; CD11b; CD11a; CD107a;  $\beta$ 2microglobulin; CCR10; CD97; CD95; CD93; CD89; CD82; CD74; CD64; CD63; CD58; CD55; CD50; CD48; CD47; CD45; CD44; CD43; CD367; CD354; CD35; CD33; CD31; CD298; CD277; CD27; CD263; Class I HLA; GPR83; GD2; FPR3; CD88; CD59; CD45RO; CD371; CD369; CD301; CD284; CD282; CD269; CD243; CD24; CD217; CD199; CD197; CD184; CD158b; CCR8; TM4SF20; TCR $\alpha\beta$ ; Siglec-8; MSC (W7C6); IL-21 R; CD195; CD132; CD85d; CD85a; CD49f; CD294; CD210; CD120b; CD201; CD115; CD66b; Sialyl Lewis X; CD92; CD66ace; CD368; CD32; CD274; CD181; CD11c; MSC (W3D5); LOX-1s; Integrin $\beta$ 5.

**Figure S4: Cell surface antigen expressed by the monocytic population isolated from the R3 sample.**
